# Supplementary material for: HN1 contributes to migration, invasion, and tumorigenesis of breast cancer by enhancing MYC activity
Source: Mol Cancer. 2017 May 11;16:90. doi: 10.1186/s12943-017-0656-1 (PMC5426009; doi:10.1186/s12943-017-0656-1)
Supplement: Supplementary file 1 — Fresh human tissue samples including 12 breast cancer tissues and 4 normal mammary tissues. (XLSX 17.3 kb) [file 12943_2017_656_MOESM1_ESM.xlsx]

## Sheet: Sheet1
Stage	Survival（S，0；D，1）	Time（month）	HN1	Relapse	Relapse time	总分期
3	0	81	1	1	18	ⅢC
3	1	79	1	0	79	ⅢB
1	0	81	0	0	81	Ⅰ
2	0	62	1	0	62	ⅡB
3	0	62	1	0	62	ⅢA
1	0	61	0	0	61	Ⅰ
1	0	61	0	0	61	Ⅰ
1	0	60	1	0	60	Ⅰ
2	1	78	1	1	66	ⅡB
1	0	78	1	0	78	Ⅰ
1	0	79	0	0	79	Ⅰ
1	0	64	0	0	64	Ⅰ
2	0	79	1	0	79	ⅡA
2	0	64	1	1	31	ⅡA
2	0	67	0	1	27	ⅡA
2	1	78	1	0	78	ⅡB
3	0	65	0	0	65	ⅢB
4	1	64	1	0	64	IV
3	1	64	0	0	64	ⅢA
1	0	66	1	0	66	Ⅰ
2	0	78	1	0	78	ⅡB
2	0	64	0	0	64	ⅡB
3	0	67	0	0	67	ⅢA
2	0	78	0	1	42	ⅡA
1	0	63	0	0	63	Ⅰ
2	0	63	0	0	63	ⅡA
2	0	77	1	0	77	ⅡB
3	0	77	0	1	50	ⅢA
3	0	77	0	0	77	ⅢA
1	0	77	1	0	77	Ⅰ
3	0	63	0	0	63	ⅢC
2	0	77	1	0	77	ⅡA
2	0	65	0	0	65	ⅡB
4	0	73	0	1	63	IV
1	0	62	0	0	62	Ⅰ
3	0	62	0	0	62	ⅢB
1	0	64	0	0	64	Ⅰ
3	0	64	1	0	64	ⅢA
3	0	64	1	0	64	ⅢA
2	0	65	0	0	65	ⅡB
1	0	62	0	0	62	Ⅰ
2	0	67	1	0	67	ⅡB
2	1	61	1	0	61	ⅡB
2	0	61	1	0	61	ⅡB
3	1	75	1	1	60	ⅢC
3	0	75	0	0	75	ⅢA
2	0	61	0	0	61	ⅡA
2	0	72	0	0	72	ⅡB
2	0	33	1	0	33	ⅡB
4	0	74	1	0	74	IV
2	0	61	0	0	61	ⅡA
4	1	75	1	1	12	IV
3	0	61	1	1	34	ⅢC
2	0	61	1	0	61	ⅡB
1	0	61	1	1	56	Ⅰ
1	0	61	0	1	33	Ⅰ
3	0	11	1	0	11	ⅢA
2	0	61	0	0	61	ⅡA
4	1	44	1	1	25	IV
2	0	76	0	0	76	ⅡA
3	1	74	0	0	74	ⅢC
2	0	60	1	1	43	ⅡB
2	0	60	1	0	60	ⅡA
1	0	74	0	0	74	Ⅰ
2	0	71	0	0	71	ⅡA
3	0	72	1	0	72	ⅢC
3	0	71	0	0	71	ⅢA
3	1	60	1	0	60	ⅢC
4	0	74	1	1	51	IV
3	0	55	1	0	55	ⅢA
1	0	61	1	0	61	Ⅰ
2	1	58	1	1	32	ⅡA
3	1	60	1	1	46	ⅢB
1	0	59	0	0	59	Ⅰ
2	0	61	1	0	61	ⅡA
4	0	61	0	0	61	IV
3	0	72	0	0	72	ⅢA
3	0	58	1	0	58	ⅢA
1	0	58	0	0	58	Ⅰ
1	0	72	0	0	72	Ⅰ
3	0	58	0	0	58	ⅢA
3	0	60	1	0	60	ⅢC
3	0	72	0	0	72	ⅢA
2	0	58	0	0	58	ⅡB
2	0	58	1	0	58	ⅡA
2	0	72	0	0	72	ⅡA
1	0	58	0	0	58	Ⅰ
2	0	58	1	0	58	ⅡA
2	0	58	1	0	58	ⅡA
2	0	58	0	0	58	ⅡA
2	0	72	0	0	72	ⅡB
1	0	57	1	0	57	Ⅰ
1	0	71	1	0	71	Ⅰ
2	0	71	0	0	71	ⅡA
1	0	57	0	0	57	Ⅰ
1	0	59	0	0	59	Ⅰ
1	0	59	0	0	59	Ⅰ
2	0	57	0	0	57	ⅡA
3	0	57	0	0	57	ⅢA
2	0	57	1	0	57	ⅡB
3	1	56	1	0	56	ⅢC
1	0	56	1	0	56	Ⅰ
4	1	59	1	1	48	IV
2	0	58	0	1	26	ⅡB
1	0	58	1	0	58	Ⅰ
3	0	58	0	0	58	ⅢA
2	0	58	1	0	58	ⅡB
2	0	56	0	0	56	ⅡA
2	0	56	0	1	31	ⅡB
3	0	66	0	0	66	ⅢB
3	0	69	1	0	69	ⅢB
2	0	69	0	0	69	ⅡA
2	0	69	1	0	69	ⅡA
2	0	55	1	0	55	ⅡA
2	0	55	0	0	55	ⅡA
2	0	51	0	0	51	ⅡB
2	0	55	0	0	55	ⅡA
3	1	28	0	1	24	ⅢB
2	0	28	0	0	28	ⅡA
2	0	28	1	0	28	ⅡA
2	0	28	1	0	28	ⅡA
2	0	67	0	0	67	ⅡA
3	1	53	1	1	48	ⅢB
2	0	52	0	0	52	ⅡA
3	1	52	1	1	44	ⅢA
3	1	9	0	0	9	ⅢA
3	1	49	0	1	47	Ⅲ
3	1	25	0	0	25	ⅢB
3	1	37	1	0	37	ⅢC
2	1	38	0	0	38	ⅡA
3	1	19	1	1	17	ⅢA
4	1	11	1	0	11	IV
2	1	47	1	0	47	ⅡB
2	1	46	0	0	46	ⅡB
4	1	48	1	1	40	IV
3	1	32	0	0	32	ⅢA
4	1	32	0	0	32	IV
2	1	57	1	1	50	ⅡB
3	0	64	0	0	64	ⅢC
3	1	41	1	0	41	ⅢC
2	1	41	1	0	41	ⅡA
3	0	54	0	0	54	ⅢC
2	0	67	1	1	26	ⅡA
2	0	79	0	0	79	ⅡA
1	0	80	0	1	17	Ⅰ
3	0	66	0	0	66	ⅢC
3	0	66	1	1	12	ⅢA
3	0	65	0	0	65	ⅢB
2	0	65	1	0	65	ⅡA
4	0	65	1	1	14	IV
2	0	65	1	0	65	ⅡB
2	0	80	0	0	80	ⅡA
2	0	64	1	0	64	ⅡA
3	0	64	0	0	64	ⅢA
1	0	64	1	0	64	Ⅰ
2	0	79	0	0	79	ⅡA
2	0	77	0	0	77	ⅡA
2	0	77	0	0	77	ⅡA
3	0	77	1	0	77	ⅢB
2	0	75	1	0	75	ⅡA
2	0	75	0	0	75	ⅡA
2	0	75	0	0	75	ⅡA
2	0	75	0	0	75	ⅡA
1	0	60	1	0	60	Ⅰ
1	0	59	0	0	59	Ⅰ
3	0	73	0	0	73	ⅢC
2	0	59	0	0	59	ⅡA
2	0	73	1	0	73	ⅡA
2	0	59	0	0	59	ⅡA
1	0	59	0	0	59	Ⅰ
2	0	72	0	0	72	ⅡA
2	0	59	1	0	59	ⅡA
2	0	59	0	0	59	ⅡB
4	0	73	0	0	73	IV
1	0	58	0	0	58	Ⅰ
2	0	58	0	0	58	ⅡA
2	0	59	0	0	59	ⅡA
2	0	68	1	0	68	ⅡB
2	0	56	1	0	56	ⅡA
1	0	70	0	0	70	Ⅰ
3	0	55	0	0	55	ⅢB
2	0	58	0	0	58	ⅡB
1	0	58	0	0	58	Ⅰ
2	0	58	0	0	58	ⅡA
4	0	56	0	0	56	IV
1	0	58	0	0	58	Ⅰ
2	0	69	0	0	69	ⅡA
3	0	55	1	0	55	III
2	1	83	1	1	60	ⅡD
1	1	89	0	0	89	I
2	0	24	0	0	24	Ⅱ
3	0	27	1	0	27	ⅢB
2	0	45	0	0	45	ⅡA
3	0	19	0	0	19	ⅢA
3	1	35	0	0	35	ⅢA
2	0	32	1	0	32	ⅡD
2	0	102	1	0	102	ⅡD
2	1	20	1	0	20	ⅡD
2	0	71	0	0	71	ⅡA
3	0	55	0	0	55	ⅢA
3	0	63	0	0	63	ⅢA
3	1	3	1	0	3	ⅢA
2	1	53	0	0	53	ⅡD
2	0	63	0	0	63	ⅡD
3	0	35	1	0	35	ⅢA
3	1	25	1	1	18	Ⅲ
2	1	77	1	0	77	ⅡB
3	1	85	1	0	85	ⅢA
4	1	78	1	1	70	IV
2	1	20	1	1	19	ⅡA
4	1	34	1	1	30	IV
3	1	37	1	0	37	ⅢA
2	0	115	1	0	115	ⅡA
2	0	115	0	0	115	ⅡA
1	0	106	0	0	106	Ⅰ
3	0	106	0	0	106	ⅢA
2	1	11	1	0	11	Ⅱ
2	1	33	0	0	33	ⅡA
3	1	17	1	1	12	ⅢA
3	1	28	1	1	20	ⅢB
4	1	35	0	1	32	IV
4	1	35	1	1	33	IV
2	1	20	1	0	20	ⅡA
2	1	47	0	0	47	ⅡA
1	1	27	0	0	27	I
3	1	56	1	0	56	ⅢA
3	1	80	0	0	80	Ⅲ
4	1	5	1	0	5	IV
4	1	59	1	1	44	IV
2	1	56	0	0	56	ⅡA
3	1	24	1	1	20	ⅢA
